# Supplementary material for: Performance enhancement of solution processed perovskite solar cells incorporating functionalized silica nanoparticles
Source: Royal Society of Chemistry journal article supplement (doi:10.1039/c4ta03387f), 2014-08-21
Supplement: c4ta03387f2.zip [file c4ta03387f2.zip]

## Sheet: Sheet1
2theta	Intenisty 0 wt. % f-SiO2	Intenisty 1.0 wt. % f-SiO2
4.006	140066	140070
4.023	132422	131055
4.04	120918	120839
4.057	110742	109365
4.074	99252	99656
4.091	89539	89166
4.108	80076	80084
4.125	72752	72880
4.142	69396	68869
4.159	68453	68731
4.176	67764	67892
4.193	67915	67320
4.21	67298	67129
4.227	67022	66271
4.244	66141	65752
4.261	65791	65476
4.278	65131	65127
4.295	64544	64808
4.312	64414	64739
4.329	64351	64516
4.346	64285	64275
4.363	63544	63708
4.38	63233	63584
4.397	62969	63337
4.414	62558	62652
4.431	62407	62255
4.448	62396	62036
4.465	62123	61617
4.482	61910	61545
4.499	61315	61050
4.516	60910	60908
4.533	60412	60790
4.55	60119	60217
4.567	59919	59635
4.584	59824	59418
4.601	59283	59131
4.618	58868	58752
4.635	58588	58297
4.652	58184	58177
4.669	57644	57651
4.686	57502	57349
4.703	57026	56972
4.72	56537	56731
4.737	56274	56106
4.754	55634	55323
4.771	55075	55384
4.788	55109	55190
4.805	55041	54888
4.822	54357	54447
4.839	54179	53944
4.856	53883	53595
4.873	53541	53431
4.89	53148	52580
4.907	52687	52431
4.924	52189	52269
4.941	51933	51616
4.958	51636	51627
4.975	51003	51122
4.992	51120	50983
5.009	50654	50566
5.026	50622	50131
5.043	50284	50390
5.06	49900	49757
5.077	49267	49345
5.094	49289	49055
5.111	48948	48955
5.128	48558	48605
5.145	48410	48304
5.162	48070	47799
5.179	47616	47769
5.196	47431	47221
5.213	47365	47064
5.23	46843	46882
5.247	46860	46713
5.264	46647	46446
5.281	46283	46396
5.298	45703	45810
5.315	45708	45742
5.332	45450	45716
5.349	45322	45232
5.366	45165	45320
5.383	44967	45031
5.4	44912	44644
5.417	44840	44268
5.434	44706	44370
5.451	44630	43898
5.468	44152	43626
5.485	43776	43169
5.502	43603	43029
5.519	43330	43058
5.536	43086	43322
5.553	43171	43187
5.57	42851	42707
5.587	42485	42497
5.604	42206	42093
5.621	42202	41920
5.638	41866	41813
5.655	41738	41625
5.672	41643	41621
5.689	41435	41339
5.706	41180	41283
5.723	41211	40972
5.74	41071	40619
5.757	40897	40618
5.774	40566	40379
5.791	40338	40243
5.808	40363	40389
5.825	40242	40201
5.842	40042	39942
5.859	40281	39646
5.876	39941	39301
5.893	39528	38951
5.91	39152	38982
5.927	38898	39040
5.944	38969	38826
5.961	38732	38491
5.978	38397	38427
5.995	38554	38305
6.012	38107	38468
6.029	38217	38060
6.046	37945	37637
6.063	37788	37422
6.08	37793	37372
6.097	37513	37574
6.114	37464	37345
6.131	37059	37320
6.148	37017	36622
6.165	36931	36939
6.182	36877	36294
6.199	36571	36600
6.216	36855	36321
6.233	36137	35928
6.25	36476	35902
6.267	35858	35821
6.284	35749	35391
6.301	35950	35466
6.318	35442	35416
6.335	35220	35332
6.352	35585	35183
6.369	35244	34829
6.386	34921	34930
6.403	34822	34506
6.42	34669	34454
6.437	34758	34347
6.454	34623	34060
6.471	34367	33821
6.488	34397	33895
6.505	34166	33509
6.522	33713	33692
6.539	34172	33360
6.556	33699	33483
6.573	33273	33329
6.59	33196	33210
6.607	33064	32851
6.624	32790	32894
6.641	32748	32857
6.658	32878	32495
6.675	32605	32544
6.692	32246	32465
6.709	32232	32345
6.726	32085	32064
6.743	32034	32082
6.76	32068	31754
6.777	31749	31526
6.794	31513	31670
6.811	31605	31442
6.828	31584	31407
6.845	31278	31429
6.862	30978	31006
6.879	31116	31028
6.896	30968	31139
6.913	30876	31068
6.93	30718	30803
6.947	30576	30359
6.964	30542	30225
6.981	30291	30102
6.998	29887	29918
7.015	29782	29829
7.032	29644	29463
7.049	29527	29318
7.066	29332	29247
7.083	29256	29205
7.1	29165	29178
7.117	29234	28774
7.134	28940	28662
7.151	28488	28357
7.168	28818	28261
7.185	28633	28043
7.202	28343	28023
7.219	28282	28101
7.236	28052	27883
7.253	28291	27523
7.27	27904	27777
7.287	27737	27734
7.304	27505	27275
7.321	27385	27238
7.338	27562	27011
7.355	27382	27063
7.372	27478	27323
7.389	27031	26702
7.406	26908	26769
7.423	26775	26848
7.44	26669	26560
7.457	26685	26299
7.474	26148	26430
7.491	26108	26284
7.508	26014	26151
7.525	26085	25846
7.542	26072	25697
7.559	25815	25780
7.576	25689	25732
7.593	25695	25399
7.61	25617	25335
7.627	25355	25315
7.644	25326	25028
7.661	25209	24900
7.678	25064	24743
7.695	25011	24824
7.712	24828	24513
7.729	24718	24478
7.746	24795	24341
7.763	24722	24433
7.78	24568	24299
7.797	24297	23973
7.814	24269	24112
7.831	24085	23862
7.848	23867	23744
7.865	23858	23764
7.882	23985	23695
7.899	24001	23586
7.916	23779	23347
7.933	23529	23042
7.95	23402	22898
7.967	23349	23126
7.984	23212	22996
8.001	22995	22929
8.018	22808	23048
8.035	22691	22759
8.052	22763	22675
8.069	22659	22752
8.086	22539	22520
8.103	22645	22339
8.12	22537	22371
8.137	22332	22212
8.154	22073	21941
8.171	22266	22098
8.188	22416	22109
8.205	22200	21932
8.222	22185	21636
8.239	22070	21634
8.256	21801	21479
8.273	22084	21606
8.29	21813	21604
8.307	21668	21419
8.324	21571	21442
8.341	21732	21346
8.358	21722	21099
8.375	21566	21114
8.392	21599	21188
8.409	21476	20942
8.426	21731	20874
8.443	21470	21142
8.46	21451	21122
8.477	21167	21087
8.494	21373	20765
8.511	20740	20773
8.528	20566	20703
8.545	20788	20524
8.562	21128	20528
8.579	20885	20462
8.596	20659	20428
8.613	20731	20227
8.63	20629	20346
8.647	20684	20552
8.664	20650	20287
8.681	20565	20354
8.698	20362	20378
8.715	20465	20299
8.732	20614	20214
8.749	20378	20265
8.766	20355	20347
8.783	20477	20155
8.8	20130	19758
8.817	20203	19775
8.834	20223	19982
8.851	20304	20073
8.868	20368	19948
8.885	20026	19692
8.902	20008	19696
8.919	20034	19814
8.936	19940	19853
8.953	19971	19818
8.97	19850	19700
8.987	19632	19638
9.004	19780	19779
9.021	19913	19720
9.038	19875	19576
9.055	19783	19668
9.072	19779	19677
9.089	19919	19473
9.106	19933	19389
9.123	19838	19540
9.14	19907	19583
9.157	19966	19540
9.174	19847	19461
9.191	19732	19300
9.208	19919	19436
9.225	19903	19502
9.242	19845	19503
9.259	19745	19558
9.276	19609	19479
9.293	19594	19432
9.31	19682	19457
9.327	19620	19308
9.344	19525	19352
9.361	19435	19276
9.378	19547	19125
9.395	19741	19308
9.412	19691	19311
9.429	19474	19361
9.446	19611	19349
9.463	19623	19403
9.48	19745	19281
9.497	19756	19433
9.514	19523	19306
9.531	19373	19181
9.548	19570	19454
9.565	19424	19149
9.582	19465	19248
9.599	19404	19125
9.616	19413	19270
9.633	19451	19089
9.65	19355	19232
9.667	19275	19299
9.684	19252	19033
9.701	19308	19227
9.718	19425	18959
9.735	19283	19091
9.752	19540	19036
9.769	19419	19056
9.786	19249	19103
9.803	19191	18823
9.82	19326	19134
9.837	19444	19010
9.854	19566	18975
9.871	19289	18835
9.888	19256	19090
9.905	19242	19050
9.922	19433	18901
9.939	19295	19079
9.956	19371	18985
9.973	19121	18907
9.99	19126	18665
10.007	19274	18809
10.024	19331	18623
10.041	19231	18704
10.058	19107	18734
10.075	19088	18823
10.092	19106	18852
10.109	19146	18684
10.126	19128	18647
10.143	19205	18713
10.16	19168	18622
10.177	18985	18600
10.194	19044	18652
10.211	19134	18653
10.228	19051	18610
10.245	18975	18626
10.262	18922	18616
10.279	18946	18714
10.296	18942	18910
10.313	19052	18849
10.33	18851	18656
10.347	18709	18703
10.364	19004	18550
10.381	19135	18764
10.398	18942	18707
10.415	18931	18490
10.432	18897	18598
10.449	18867	18541
10.466	18905	18386
10.483	18837	18522
10.5	18900	18349
10.517	18812	18520
10.534	18887	18515
10.551	18886	18357
10.568	18832	18452
10.585	18730	18369
10.602	18874	18474
10.619	18741	18466
10.636	18632	18357
10.653	18880	18487
10.67	18788	18264
10.687	18589	18264
10.704	18607	18739
10.721	18813	18350
10.738	18651	18455
10.755	18721	18364
10.772	18566	18570
10.789	18620	18419
10.806	18679	18358
10.823	18677	18395
10.84	18597	18136
10.857	18495	18218
10.874	18514	18314
10.891	18473	18394
10.908	18542	18019
10.925	18407	18099
10.942	18621	18099
10.959	18686	18218
10.976	18335	18087
10.993	18431	18143
11.01	18281	17985
11.027	18386	17983
11.044	18432	18214
11.061	18486	18136
11.078	18446	17833
11.095	18320	17911
11.112	18178	18025
11.129	18253	18007
11.146	18307	18002
11.163	18360	17809
11.18	18401	17832
11.197	18496	17838
11.214	18584	17794
11.231	18448	17963
11.248	18381	17808
11.265	18411	17657
11.282	18474	17626
11.299	18330	17812
11.316	18226	17831
11.333	18216	17625
11.35	18245	17564
11.367	18334	17511
11.384	18380	17569
11.401	18205	17680
11.418	18045	17595
11.435	17925	17571
11.452	18090	17441
11.469	18222	17442
11.486	18297	17556
11.503	18160	17666
11.52	18103	17495
11.537	18032	17448
11.554	18006	17488
11.571	18122	17546
11.588	17979	17553
11.605	17965	17424
11.622	17927	17329
11.639	18077	17529
11.656	18032	17463
11.673	17984	17288
11.69	17655	17101
11.707	18028	17337
11.724	18029	17312
11.741	18182	17312
11.758	17964	17298
11.775	18025	17097
11.792	17887	17259
11.809	18003	17119
11.826	18266	17361
11.843	18059	17267
11.86	18649	17157
11.877	18392	17329
11.894	18164	17321
11.911	18084	17382
11.928	18161	17435
11.945	18437	17334
11.962	18709	17409
11.979	18397	17203
11.996	18358	17249
12.013	18546	17355
12.03	18762	17107
12.047	19066	17178
12.064	19037	17252
12.081	19298	17240
12.098	19753	17278
12.115	19927	17401
12.132	20431	17441
12.149	20885	17390
12.166	21461	17568
12.183	21941	17518
12.2	22446	17624
12.217	23121	17934
12.234	23443	17782
12.251	23706	18186
12.268	23652	18129
12.285	23175	17987
12.302	22606	17937
12.319	22123	17905
12.336	21631	17651
12.353	21109	17471
12.37	20371	17464
12.387	19391	17290
12.404	18656	17073
12.421	18341	16983
12.438	18154	16855
12.455	17998	16831
12.472	17937	16617
12.489	17746	16542
12.506	17570	16593
12.523	17677	16616
12.54	17670	16535
12.557	17641	16509
12.574	17574	16513
12.591	17558	16409
12.608	17658	16399
12.625	17531	16315
12.642	17416	16380
12.659	17584	16399
12.676	17422	16309
12.693	17432	16272
12.71	17391	16336
12.727	17415	16350
12.744	17455	16345
12.761	17377	16194
12.778	17265	16116
12.795	17556	16152
12.812	17366	16336
12.829	17371	16284
12.846	17255	16134
12.863	17392	16066
12.88	17424	16070
12.897	17392	16100
12.914	17448	16075
12.931	17388	16087
12.948	17428	16048
12.965	17507	16223
12.982	17603	16119
12.999	17637	16125
13.016	17675	16261
13.033	17895	16066
13.05	17834	16276
13.067	18130	16187
13.084	18203	16033
13.101	18129	16211
13.118	18493	16331
13.135	18739	16387
13.152	19139	16378
13.169	19482	16499
13.186	20083	16545
13.203	20648	16949
13.22	21365	17228
13.237	22561	17405
13.254	23285	17743
13.271	24271	18031
13.288	24874	18201
13.305	25695	18625
13.322	26650	19275
13.339	27820	19623
13.356	29071	20210
13.373	30636	20794
13.39	32861	21589
13.407	35411	22583
13.424	38754	23729
13.441	43152	25164
13.458	48548	27043
13.475	54973	29043
13.492	62462	31160
13.509	71398	34271
13.526	82852	37864
13.543	97063	41686
13.56	115962	46191
13.577	141935	51556
13.594	176913	58190
13.611	223273	66480
13.628	281540	78015
13.645	351704	93750
13.662	440595	115688
13.679	554485	145685
13.696	686941	182493
13.713	795669	219608
13.73	788087	235846
13.747	637953	210074
13.764	441141	158790
13.781	265464	105918
13.798	144028	63949
13.815	85123	40262
13.832	60677	29552
13.849	49637	25209
13.866	43018	22592
13.883	38637	21293
13.9	34800	20234
13.917	32276	19331
13.934	29948	18692
13.951	28049	17956
13.968	26412	17422
13.985	25109	17129
14.002	23761	16764
14.019	22948	16551
14.036	21970	16369
14.053	21756	16187
14.07	21360	16018
14.087	21059	15806
14.104	20279	15830
14.121	20352	15732
14.138	20111	15499
14.155	19868	15302
14.172	19518	15421
14.189	19216	15258
14.206	19101	15016
14.223	19047	15109
14.24	18699	15081
14.257	18625	14871
14.274	18536	15037
14.291	18358	14916
14.308	18329	14835
14.325	18260	14782
14.342	17993	14823
14.359	17882	14505
14.376	17793	14298
14.393	17544	14515
14.41	17398	14445
14.427	17203	14455
14.444	17220	14365
14.461	17027	14367
14.478	17233	14246
14.495	17164	14156
14.512	16929	14171
14.529	16770	14198
14.546	16701	14126
14.563	16666	13912
14.58	16513	13883
14.597	16378	13745
14.614	16307	13727
14.631	16265	13684
14.648	16317	13634
14.665	16243	13785
14.682	16366	13609
14.699	16526	13581
14.716	16090	13647
14.733	15948	13531
14.75	16124	13527
14.767	16115	13620
14.784	16006	13628
14.801	15949	13446
14.818	16016	13550
14.835	15932	13484
14.852	15901	13398
14.869	15769	13252
14.886	15659	13226
14.903	15761	13271
14.92	15538	13210
14.937	15406	13203
14.954	15393	13204
14.971	15464	13216
14.988	15516	13119
15.005	15650	13104
15.022	15630	13079
15.039	15454	13075
15.056	15536	13017
15.073	15400	12954
15.09	15353	12955
15.107	15282	12891
15.124	14974	12815
15.141	14793	12784
15.158	14823	12763
15.175	14692	12622
15.192	14766	12769
15.209	14550	12718
15.226	14435	12939
15.243	14333	12539
15.26	14381	12505
15.277	14238	12598
15.294	14171	12537
15.311	14184	12417
15.328	14130	12350
15.345	14169	12310
15.362	14118	12576
15.379	14035	12464
15.396	13923	12460
15.413	13922	12353
15.43	13876	12187
15.447	13682	12113
15.464	13700	12010
15.481	13606	12230
15.498	13496	12223
15.515	13527	12014
15.532	13587	12067
15.549	13673	12034
15.566	13592	11920
15.583	13476	11870
15.6	13508	11790
15.617	13414	11857
15.634	13323	11863
15.651	13242	11685
15.668	13378	11687
15.685	13308	11853
15.702	13275	11815
15.719	13157	11798
15.736	13251	11693
15.753	13092	11737
15.77	12871	11764
15.787	12919	11562
15.804	13008	11448
15.821	13099	11437
15.838	12942	11440
15.855	12859	11606
15.872	12952	11578
15.889	13055	11567
15.906	12896	11425
15.923	12672	11317
15.94	12646	11299
15.957	12602	11317
15.974	12785	11385
15.991	12716	11374
16.008	12596	11262
16.025	12573	11232
16.042	12558	11104
16.059	12473	11147
16.076	12264	11051
16.093	12384	11016
16.11	12431	10984
16.127	12247	10881
16.144	12241	10869
16.161	12205	11011
16.178	12272	11009
16.195	12262	11191
16.212	12170	10817
16.229	12004	10875
16.246	12253	10977
16.263	12036	10883
16.28	11978	10653
16.297	12142	10882
16.314	12107	10836
16.331	11902	10564
16.348	12012	10662
16.365	11954	10719
16.382	11987	10623
16.399	11864	10735
16.416	11979	10533
16.433	11790	10694
16.45	11756	10559
16.467	11622	10506
16.484	11642	10582
16.501	11568	10655
16.518	11617	10502
16.535	11728	10442
16.552	11677	10565
16.569	11520	10531
16.586	11529	10620
16.603	11327	10405
16.62	11561	10490
16.637	11394	10487
16.654	11387	10365
16.671	11313	10350
16.688	11414	10405
16.705	11365	10251
16.722	11394	10173
16.739	11227	10237
16.756	11138	10341
16.773	11216	10284
16.79	11191	10246
16.807	11136	10288
16.824	11164	10190
16.841	11364	10215
16.858	11341	10146
16.875	11242	10134
16.892	11038	10136
16.909	11042	10154
16.926	11114	10182
16.943	11064	10145
16.96	10909	10148
16.977	11025	10120
16.994	11155	10065
17.011	11020	9993
17.028	10950	10001
17.045	11019	9933
17.062	10955	9991
17.079	10969	9916
17.096	10980	10012
17.113	11037	10098
17.13	10878	9957
17.147	10768	9918
17.164	10793	9826
17.181	10823	10025
17.198	10763	9988
17.215	10716	9969
17.232	10721	9918
17.249	10860	9894
17.266	10677	9838
17.283	10564	9713
17.3	10788	9674
17.317	10859	9811
17.334	10854	9913
17.351	10949	9714
17.368	10660	9727
17.385	10703	9840
17.402	10766	9663
17.419	10594	9651
17.436	10748	9986
17.453	10479	9661
17.47	10605	9781
17.487	10525	9624
17.504	10726	9540
17.521	10397	9674
17.538	10478	9562
17.555	10416	9684
17.572	10239	9784
17.589	10562	9769
17.606	10224	9802
17.623	10592	9698
17.64	10432	9720
17.657	10274	9593
17.674	10322	9594
17.691	10466	9589
17.708	10590	9753
17.725	10424	9551
17.742	10375	9568
17.759	10500	9377
17.776	10390	9589
17.793	10431	9443
17.81	10281	9412
17.827	10292	9515
17.844	10291	9561
17.861	10255	9507
17.878	10298	9402
17.895	10241	9333
17.912	10203	9268
17.929	10163	9447
17.946	10110	9508
17.963	10144	9486
17.98	10250	9437
17.997	10276	9385
18.014	10200	9449
18.031	10035	9398
18.048	10027	9269
18.065	10173	9236
18.082	10217	9258
18.099	10182	9372
18.116	10202	9315
18.133	10164	9354
18.15	9981	9428
18.167	9954	9381
18.184	10204	9359
18.201	10170	9346
18.218	10057	9366
18.235	10174	9192
18.252	10118	9162
18.269	10082	9173
18.286	9992	9334
18.303	10098	9298
18.32	10138	9274
18.337	10104	9388
18.354	9968	9313
18.371	10043	9271
18.388	9871	9157
18.405	9979	9195
18.422	9997	9097
18.439	9935	9235
18.456	10040	9232
18.473	9938	9164
18.49	9881	9302
18.507	9973	9229
18.524	9878	9212
18.541	10094	9180
18.558	9930	9293
18.575	9889	9337
18.592	10016	9092
18.609	9867	9135
18.626	9768	9172
18.643	9988	9177
18.66	9810	9155
18.677	9951	9117
18.694	9851	9068
18.711	9834	9168
18.728	9850	9076
18.745	9888	9157
18.762	9900	9139
18.779	9898	9143
18.796	9927	9077
18.813	9863	9216
18.83	9931	9123
18.847	9916	9157
18.864	9901	9140
18.881	9925	9290
18.898	9911	9277
18.915	9989	9111
18.932	9960	9043
18.949	9876	9116
18.966	9839	9217
18.983	9818	9185
19	9832	9192
19.017	9846	9122
19.034	9904	9050
19.051	9746	8958
19.068	9766	9137
19.085	9854	9188
19.102	9688	9078
19.119	9616	9073
19.136	9691	9025
19.153	9668	9184
19.17	9693	9182
19.187	9806	9007
19.204	9776	8977
19.221	9719	9018
19.238	9741	9007
19.255	9775	9082
19.272	9837	9070
19.289	9887	9040
19.306	9849	9076
19.323	9843	9259
19.34	9849	9288
19.357	9945	9372
19.374	9909	9433
19.391	10017	9519
19.408	10074	9627
19.425	10130	9822
19.442	10221	9842
19.459	10308	10118
19.476	10386	10438
19.493	10501	11003
19.51	10633	11274
19.527	10685	11511
19.544	10912	11935
19.561	10957	12095
19.578	10800	12286
19.595	11039	12521
19.612	11074	12710
19.629	10886	12676
19.646	10644	12316
19.663	10390	11661
19.68	9947	11044
19.697	9842	10307
19.714	9970	9758
19.731	9746	9441
19.748	9775	9298
19.765	9630	9198
19.782	9654	8988
19.799	9742	8923
19.816	9494	8978
19.833	9677	8855
19.85	9689	9034
19.867	9588	9072
19.884	9555	8876
19.901	9544	8965
19.918	9510	9048
19.935	9566	9009
19.952	9621	8932
19.969	9440	8885
19.986	9464	8891
20.003	9386	8870
20.02	9511	8883
20.037	9570	8952
20.054	9572	8867
20.071	9415	8769
20.088	9605	8766
20.105	9624	8758
20.122	9527	8744
20.139	9494	8794
20.156	9466	8808
20.173	9406	8852
20.19	9400	8758
20.207	9410	8753
20.224	9418	8792
20.241	9442	8775
20.258	9397	8793
20.275	9427	8892
20.292	9382	8912
20.309	9351	8815
20.326	9381	8841
20.343	9408	8891
20.36	9488	8868
20.377	9453	8822
20.394	9363	8905
20.411	9419	8922
20.428	9468	8792
20.445	9414	8745
20.462	9371	8711
20.479	9292	8695
20.496	9408	8800
20.513	9355	8761
20.53	9354	8775
20.547	9427	8734
20.564	9442	8737
20.581	9370	8846
20.598	9274	8796
20.615	9350	8781
20.632	9373	8767
20.649	9493	8820
20.666	9287	8880
20.683	9287	8967
20.7	9312	8745
20.717	9340	8890
20.734	9282	8702
20.751	9367	8737
20.768	9331	8647
20.785	9358	8805
20.802	9337	8707
20.819	9373	8631
20.836	9259	8802
20.853	9334	8657
20.87	9469	8660
20.887	9211	8912
20.904	9265	8767
20.921	9326	8747
20.938	9276	8674
20.955	9215	8727
20.972	9308	8762
20.989	9311	8771
21.006	9264	8695
21.023	9299	8620
21.04	9221	8884
21.057	9124	8862
21.074	9191	8758
21.091	9243	8807
21.108	9194	8829
21.125	9129	8708
21.142	9216	8591
21.159	9422	8731
21.176	9267	8678
21.193	9179	8719
21.21	9185	8613
21.227	9165	8666
21.244	9225	8700
21.261	9131	8734
21.278	9151	8675
21.295	9151	8570
21.312	9138	8679
21.329	9223	8769
21.346	9188	8756
21.363	9198	8674
21.38	9213	8623
21.397	9160	8598
21.414	9033	8719
21.431	8998	8809
21.448	9102	8772
21.465	9120	8732
21.482	8955	8784
21.499	8987	8832
21.516	9179	8866
21.533	9128	8696
21.55	9033	8715
21.567	9018	8708
21.584	9120	8828
21.601	9275	8845
21.618	9236	8868
21.635	9197	8779
21.652	9062	9011
21.669	9249	8898
21.686	9199	8763
21.703	9335	8722
21.72	9235	8836
21.737	9150	8787
21.754	9077	8842
21.771	9044	8789
21.788	9051	8665
21.805	9015	8658
21.822	9103	8751
21.839	8860	8797
21.856	8898	8719
21.873	9071	8543
21.89	9117	8642
21.907	8953	8616
21.924	9127	8614
21.941	9059	8729
21.958	8868	8824
21.975	8922	8681
21.992	8951	8731
22.009	9047	8577
22.026	9084	8655
22.043	8792	8665
22.06	8992	8746
22.077	9083	8663
22.094	9130	8646
22.111	9101	8715
22.128	8973	8553
22.145	8983	8397
22.162	8856	8565
22.179	8980	8635
22.196	8943	8604
22.213	9028	8622
22.23	8828	8549
22.247	8940	8650
22.264	9017	8633
22.281	8980	8619
22.298	8966	8690
22.315	9047	8634
22.332	9024	8719
22.349	8947	8529
22.366	8918	8460
22.383	9004	8519
22.4	8833	8645
22.417	8848	8682
22.434	8890	8661
22.451	8978	8639
22.468	9091	8672
22.485	9109	8600
22.502	9011	8614
22.519	8832	8673
22.536	9006	8541
22.553	8916	8573
22.57	8794	8588
22.587	8973	8523
22.604	9056	8486
22.621	9034	8474
22.638	8881	8565
22.655	8837	8579
22.672	8914	8668
22.689	8916	8805
22.706	9065	8698
22.723	9043	8673
22.74	8965	8548
22.757	8972	8685
22.774	8893	8745
22.791	8908	8841
22.808	9078	8911
22.825	9151	8893
22.842	9112	8790
22.859	9149	8801
22.876	9226	8881
22.893	9195	9019
22.91	9334	9102
22.927	9593	9283
22.944	9839	9327
22.961	9999	9541
22.978	10343	9906
22.995	10886	10252
23.012	11092	10933
23.029	11762	11271
23.046	12796	12346
23.063	13228	13179
23.08	13953	14271
23.097	14132	14862
23.114	13784	15140
23.131	12711	14195
23.148	11865	12844
23.165	11277	12184
23.182	10754	11329
23.199	9820	10500
23.216	9535	9475
23.233	9122	9233
23.25	9072	9111
23.267	9050	8914
23.284	9129	8986
23.301	8965	8793
23.318	8908	8764
23.335	8799	8792
23.352	8779	8597
23.369	8872	8479
23.386	8741	8571
23.403	8732	8642
23.42	8876	8582
23.437	8771	8500
23.454	8670	8444
23.471	8821	8628
23.488	8782	8663
23.505	8640	8740
23.522	8710	8627
23.539	8754	8656
23.556	8633	8626
23.573	8682	8580
23.59	8627	8560
23.607	8643	8541
23.624	8739	8476
23.641	8731	8491
23.658	8646	8541
23.675	8612	8508
23.692	8608	8435
23.709	8626	8401
23.726	8619	8470
23.743	8498	8478
23.76	8552	8403
23.777	8643	8571
23.794	8722	8642
23.811	8806	8654
23.828	8853	8618
23.845	8824	8599
23.862	8794	8622
23.879	8851	8623
23.896	8925	8665
23.913	8782	8629
23.93	8731	8775
23.947	8910	8837
23.964	8973	8931
23.981	9138	8934
23.998	9252	9253
24.015	9454	9553
24.032	9628	9615
24.049	9728	9886
24.066	10037	10088
24.083	10200	10375
24.1	10275	10702
24.117	10211	11107
24.134	9889	10659
24.151	9771	10259
24.168	9565	9949
24.185	9202	9611
24.202	8818	9298
24.219	8699	8988
24.236	8853	8903
24.253	8765	8677
24.27	8668	8586
24.287	8678	8615
24.304	8397	8581
24.321	8514	8733
24.338	8552	8614
24.355	8569	8538
24.372	8702	8641
24.389	8600	8689
24.406	8558	8604
24.423	8678	8699
24.44	8597	8607
24.457	8453	8611
24.474	8403	8535
24.491	8356	8563
24.508	8507	8502
24.525	8560	8438
24.542	8456	8244
24.559	8447	8321
24.576	8500	8408
24.593	8473	8452
24.61	8464	8520
24.627	8439	8496
24.644	8332	8402
24.661	8476	8399
24.678	8661	8432
24.695	8602	8469
24.712	8522	8428
24.729	8429	8447
24.746	8462	8420
24.763	8460	8383
24.78	8364	8526
24.797	8295	8557
24.814	8367	8562
24.831	8581	8591
24.848	8518	8525
24.865	8504	8462
24.882	8606	8495
24.899	8612	8573
24.916	8537	8617
24.933	8591	8517
24.95	8555	8487
24.967	8508	8439
24.984	8512	8466
25.001	8625	8547
25.018	8608	8625
25.035	8675	8642
25.052	8682	8548
25.069	8760	8469
25.086	8726	8506
25.103	8778	8323
25.12	8740	8411
25.137	8752	8462
25.154	8787	8639
25.171	8891	8438
25.188	9024	8559
25.205	9029	8593
25.222	9262	8787
25.239	9518	8813
25.256	9586	8809
25.273	9399	8842
25.29	9136	8557
25.307	8968	8539
25.324	8688	8513
25.341	8720	8494
25.358	8728	8561
25.375	8678	8582
25.392	8926	8622
25.409	8680	8603
25.426	8737	8552
25.443	8692	8750
25.46	8757	8659
25.477	8686	8570
25.494	8500	8498
25.511	8687	8590
25.528	8736	8553
25.545	8844	8561
25.562	8889	8750
25.579	8923	8789
25.596	8829	8723
25.613	9068	8879
25.63	9080	8833
25.647	9113	9053
25.664	9226	9157
25.681	9349	9038
25.698	9342	9060
25.715	9508	9035
25.732	9761	9239
25.749	9795	9352
25.766	9900	9479
25.783	10129	9577
25.8	10363	9942
25.817	10540	10150
25.834	10970	10337
25.851	11575	10690
25.868	12020	11031
25.885	12704	11469
25.902	13465	11973
25.919	14437	12615
25.936	15762	13465
25.953	17090	14552
25.97	18633	15531
25.987	20460	16892
26.004	22363	18353
26.021	24172	19961
26.038	25767	21096
26.055	26721	22046
26.072	26853	22834
26.089	26480	22617
26.106	25419	22199
26.123	23846	21299
26.14	22315	19832
26.157	20370	18543
26.174	18457	17152
26.191	16913	15829
26.208	15537	14644
26.225	14474	13758
26.242	13580	13050
26.259	12756	12342
26.276	12141	11867
26.293	11653	11529
26.31	11339	11150
26.327	10959	10698
26.344	10729	10466
26.361	10404	10182
26.378	10046	10034
26.395	9928	10046
26.412	9668	9827
26.429	9551	9712
26.446	9348	9555
26.463	9307	9397
26.48	9133	9501
26.497	9093	9347
26.514	9034	9313
26.531	8953	9291
26.548	8850	9133
26.565	8791	9015
26.582	8772	8887
26.599	8717	8853
26.616	8601	8860
26.633	8655	8613
26.65	8672	8621
26.667	8493	8511
26.684	8539	8460
26.701	8600	8385
26.718	8364	8453
26.735	8471	8523
26.752	8446	8471
26.769	8511	8144
26.786	8420	8332
26.803	8448	8293
26.82	8366	8217
26.837	8506	8253
26.854	8386	8166
26.871	8482	8230
26.888	8351	8303
26.905	8177	8228
26.922	8205	8229
26.939	8221	8224
26.956	8300	8223
26.973	8394	8165
26.99	8455	8151
27.007	8669	8233
27.024	8755	8293
27.041	8919	8313
27.058	9163	8388
27.075	9276	8448
27.092	9218	8453
27.109	9204	8532
27.126	9411	8546
27.143	9511	8535
27.16	9436	8496
27.177	9453	8390
27.194	9622	8473
27.211	9515	8599
27.228	9433	8475
27.245	9642	8427
27.262	9646	8570
27.279	9704	8531
27.296	9728	8545
27.313	9702	8540
27.33	9751	8605
27.347	9779	8538
27.364	9948	8599
27.381	10116	8653
27.398	10195	8606
27.415	10177	8687
27.432	10489	8476
27.449	10534	8749
27.466	10485	8853
27.483	10908	8864
27.5	10913	8943
27.517	11034	8872
27.534	11268	9145
27.551	11561	9234
27.568	12089	9323
27.585	12507	9379
27.602	13017	9745
27.619	13521	9751
27.636	14124	10018
27.653	15180	10554
27.67	16520	11050
27.687	17730	11612
27.704	19168	12531
27.721	21057	13142
27.738	22882	13995
27.755	25078	14748
27.772	26932	15397
27.789	28346	15913
27.806	30140	16304
27.823	31528	16636
27.84	33142	17158
27.857	35791	18096
27.874	39074	19265
27.891	44416	20766
27.908	52238	23518
27.925	63233	27366
27.942	79236	32756
27.959	102493	40421
27.976	134466	50756
27.993	177826	64486
28.01	237195	81991
28.027	309420	103540
28.044	370400	126376
28.061	374591	138353
28.078	311826	126714
28.095	245030	101336
28.112	217323	83734
28.129	195642	76211
28.146	148962	65066
28.163	93009	46491
28.18	55720	29968
28.197	37951	20749
28.214	29135	16402
28.231	24177	14115
28.248	20776	12734
28.265	18441	11759
28.282	16634	11119
28.299	15204	10669
28.316	14141	10217
28.333	13284	9790
28.35	12471	9464
28.367	11937	9300
28.384	11606	9221
28.401	11063	8958
28.418	10712	8769
28.435	10470	8769
28.452	10280	8690
28.469	9943	8623
28.486	9911	8495
28.503	9727	8480
28.52	9438	8330
28.537	9561	8261
28.554	9388	8192
28.571	9252	8259
28.588	9075	8200
28.605	8950	8133
28.622	9044	8066
28.639	8982	8251
28.656	8802	7894
28.673	8713	7906
28.69	8567	8063
28.707	8649	7946
28.724	8692	7772
28.741	8547	7776
28.758	8599	7883
28.775	8412	7790
28.792	8451	8067
28.809	8337	7991
28.826	8208	7834
28.843	8202	7789
28.86	8185	7946
28.877	8136	7765
28.894	8087	7824
28.911	8092	7751
28.928	8066	7646
28.945	8057	7552
28.962	7977	7783
28.979	7968	7719
28.996	7921	7653
29.013	7817	7588
29.03	8017	7684
29.047	7942	7694
29.064	7900	7650
29.081	7970	7715
29.098	7875	7622
29.115	7805	7576
29.132	7679	7573
29.149	7698	7619
29.166	7841	7619
29.183	7838	7588
29.2	7710	7552
29.217	7653	7588
29.234	7623	7596
29.251	7634	7541
29.268	7689	7474
29.285	7664	7442
29.302	7622	7457
29.319	7567	7423
29.336	7483	7398
29.353	7563	7414
29.37	7626	7384
29.387	7568	7385
29.404	7605	7330
29.421	7555	7464
29.438	7399	7330
29.455	7370	7257
29.472	7519	7257
29.489	7494	7408
29.506	7437	7332
29.523	7342	7277
29.54	7337	7394
29.557	7328	7361
29.574	7332	7353
29.591	7427	7185
29.608	7346	7234
29.625	7220	7506
29.642	7275	7255
29.659	7347	7186
29.676	7211	7245
29.693	7266	7227
29.71	7463	7394
29.727	7223	7220
29.744	7245	7349
29.761	7256	7489
29.778	7297	7177
29.795	7206	7466
29.812	7322	7172
29.829	7178	7357
29.846	7510	7302
29.863	7307	7286
29.88	7228	7242
29.897	7146	7222
29.914	7134	7150
29.931	7186	7173
29.948	7034	7267
29.965	7043	7181
29.982	7222	7109
29.999	7223	7222
30.016	7207	7308
30.033	7141	7252
30.05	7002	7169
30.067	7057	7139
30.084	7136	7188
30.101	6953	7184
30.118	6965	7148
30.135	6989	7185
30.152	6936	7164
30.169	6920	7106
30.186	7065	6982
30.203	6997	7012
30.22	7073	7064
30.237	6975	7156
30.254	6907	7171
30.271	7007	7129
30.288	7137	7105
30.305	7258	7111
30.322	7257	7185
30.339	7252	7178
30.356	7216	7092
30.373	7187	7098
30.39	7229	7131
30.407	7369	7196
30.424	7383	7274
30.441	7475	7371
30.458	7546	7487
30.475	7537	7539
30.492	7675	7584
30.509	7757	7720
30.526	7712	7847
30.543	7674	7781
30.56	7528	7652
30.577	7484	7693
30.594	7404	7560
30.611	7318	7502
30.628	7254	7459
30.645	7171	7498
30.662	7199	7303
30.679	7138	7260
30.696	7131	7264
30.713	7080	7199
30.73	6976	7234
30.747	7075	7307
30.764	6965	7289
30.781	7091	7111
30.798	6910	6929
30.815	7004	7079
30.832	6856	7107
30.849	7008	7116
30.866	6808	7296
30.883	6796	7069
30.9	6891	6952
30.917	6722	7088
30.934	6667	7072
30.951	6732	7025
30.968	6746	7014
30.985	6849	7099
31.002	6828	7066
31.019	6696	7279
31.036	6689	7154
31.053	6748	7204
31.07	6919	7218
31.087	6942	7279
31.104	6782	7269
31.121	6976	7249
31.138	7057	7392
31.155	7090	7594
31.172	6945	7738
31.189	7130	7975
31.206	7336	8197
31.223	7490	8371
31.24	7499	8722
31.257	7697	9029
31.274	7849	9154
31.291	8103	9549
31.308	8391	9823
31.325	8876	10379
31.342	9486	11174
31.359	10407	12225
31.376	11435	13646
31.393	12729	15717
31.41	14447	18077
31.427	16247	20851
31.444	17480	23796
31.461	18429	25738
31.478	18882	26848
31.495	18937	27716
31.512	18338	27446
31.529	16734	25379
31.546	14827	22271
31.563	13174	19547
31.58	12036	17586
31.597	11032	15686
31.614	9651	13445
31.631	8374	11224
31.648	7674	9656
31.665	7285	8601
31.682	6968	7981
31.699	6797	7653
31.716	6662	7441
31.733	6543	7319
31.75	6472	7310
31.767	6444	7087
31.784	6382	6932
31.801	6398	6757
31.818	6481	6776
31.835	6351	6773
31.852	6238	6739
31.869	6304	6736
31.886	6311	6625
31.903	6340	6630
31.92	6202	6604
31.937	6238	6603
31.954	6143	6637
31.971	6190	6474
31.988	6261	6458
32.005	6317	6446
32.022	6148	6443
32.039	6323	6446
32.056	6200	6389
32.073	6114	6467
32.09	6255	6539
32.107	6146	6398
32.124	6160	6477
32.141	6198	6444
32.158	6278	6368
32.175	6276	6402
32.192	6134	6483
32.209	6130	6347
32.226	6154	6302
32.243	6173	6252
32.26	6106	6293
32.277	6096	6358
32.294	6052	6333
32.311	6031	6322
32.328	6024	6257
32.345	6015	6339
32.362	6117	6478
32.379	6116	6309
32.396	6064	6351
32.413	6065	6303
32.43	5973	6342
32.447	5939	6281
32.464	5945	6270
32.481	5970	6222
32.498	6031	6280
32.515	6030	6395
32.532	6029	6308
32.549	6069	6154
32.566	5965	6251
32.583	5948	6411
32.6	6146	6418
32.617	6063	6319
32.634	5965	6284
32.651	5981	6267
32.668	6002	6261
32.685	5934	6353
32.702	6023	6401
32.719	6021	6340
32.736	5946	6348
32.753	5946	6348
32.77	6071	6348
32.787	6110	6294
32.804	6168	6334
32.821	6100	6467
32.838	6176	6397
32.855	6286	6378
32.872	6352	6425
32.889	6272	6352
32.906	6123	6534
32.923	6269	6576
32.94	6380	6683
32.957	6485	6732
32.974	6525	6674
32.991	6514	6669
33.008	6691	6797
33.025	6936	6858
33.042	6820	7087
33.059	7199	7115
33.076	7433	7302
33.093	7775	7542
33.11	7977	7898
33.127	8375	8130
33.144	9010	8561
33.161	9258	8905
33.178	10196	9420
33.195	10757	9800
33.212	11499	10345
33.229	12374	10966
33.246	12775	11537
33.263	12896	11788
33.28	12785	11720
33.297	12463	11610
33.314	12192	11210
33.331	11734	11052
33.348	11041	10568
33.365	10653	10130
33.382	10003	9768
33.399	9511	9268
33.416	8947	8756
33.433	8428	8403
33.45	8116	8151
33.467	7819	7678
33.484	7458	7584
33.501	7354	7408
33.518	7140	7126
33.535	6943	7033
33.552	6675	6897
33.569	6637	6786
33.586	6527	6659
33.603	6393	6542
33.62	6287	6460
33.637	6212	6373
33.654	6059	6351
33.671	6038	6271
33.688	6024	6245
33.705	6017	6244
33.722	5925	6151
33.739	5746	6065
33.756	5723	6039
33.773	5637	6009
33.79	5680	5998
33.807	5724	5980
33.824	5674	6007
33.841	5592	5994
33.858	5515	5880
33.875	5506	5874
33.892	5527	5897
33.909	5569	5848
33.926	5569	5775
33.943	5536	5765
33.96	5457	5781
33.977	5518	5758
33.994	5493	5695
34.011	5458	5735
34.028	5390	5744
34.045	5370	5632
34.062	5379	5742
34.079	5372	5659
34.096	5331	5760
34.113	5274	5699
34.13	5310	5626
34.147	5181	5661
34.164	5318	5609
34.181	5243	5435
34.198	5359	5719
34.215	5230	5593
34.232	5316	5584
34.249	5391	5497
34.266	5284	5610
34.283	5286	5547
34.3	5311	5715
34.317	5173	5533
34.334	5354	5618
34.351	5063	5605
34.368	5481	5545
34.385	5229	5542
34.402	5315	5714
34.419	5294	5715
34.436	5251	5756
34.453	5316	5952
34.47	5357	5913
34.487	5414	5896
34.504	5487	6024
34.521	5736	6259
34.538	6039	6462
34.555	6159	6842
34.572	6300	7070
34.589	6292	7407
34.606	6190	7227
34.623	6042	6997
34.64	5919	6761
34.657	5842	6564
34.674	5678	6474
34.691	5679	6280
34.708	5427	6112
34.725	5364	5875
34.742	5184	5650
34.759	5064	5517
34.776	5091	5423
34.793	5041	5426
34.81	4933	5391
34.827	4906	5308
34.844	4887	5252
34.861	4848	5158
34.878	4885	5197
34.895	4926	5241
34.912	4898	5271
34.929	4877	5292
34.946	4794	5266
34.963	4740	5261
34.98	4869	5234
34.997	4939	5197
35.014	4796	5117
35.031	4742	5047
35.048	4835	5059
35.065	4748	5077
35.082	4778	5039
35.099	4820	5131
35.116	4840	5211
35.133	4759	5082
35.15	4816	5098
35.167	4822	5057
35.184	4777	5172
35.201	4773	5155
35.218	4823	5066
35.235	4725	5010
35.252	4649	5154
35.269	4774	5003
35.286	4787	5100
35.303	4706	4968
35.32	4682	4877
35.337	4800	4942
35.354	4696	5014
35.371	4719	4959
35.388	4645	5061
35.405	4667	5011
35.422	4729	4888
35.439	4751	4938
35.456	4664	4974
35.473	4615	4958
35.49	4677	4973
35.507	4672	4981
35.524	4710	4883
35.541	4691	4905
35.558	4729	4983
35.575	4579	4909
35.592	4696	4891
35.609	4682	4985
35.626	4537	4987
35.643	4608	4903
35.66	4664	4896
35.677	4581	4974
35.694	4619	5051
35.711	4717	4926
35.728	4662	4876
35.745	4580	4882
35.762	4561	4759
35.779	4506	4773
35.796	4472	4884
35.813	4655	4874
35.83	4643	4791
35.847	4553	4887
35.864	4491	4818
35.881	4585	4870
35.898	4556	4927
35.915	4499	4888
35.932	4533	4861
35.949	4613	4889
35.966	4655	4916
35.983	4577	4870
36	4551	4822
36.017	4504	4831
36.034	4600	4865
36.051	4651	4853
36.068	4497	4812
36.085	4488	4890
36.102	4488	4825
36.119	4468	4792
36.136	4497	4882
36.153	4539	4862
36.17	4572	4885
36.187	4611	4807
36.204	4597	4841
36.221	4578	4828
36.238	4610	4857
36.255	4524	4811
36.272	4527	4846
36.289	4510	4886
36.306	4517	4947
36.323	4554	4926
36.34	4610	4774
36.357	4411	4680
36.374	4514	4798
36.391	4471	4851
36.408	4469	4696
36.425	4526	4867
36.442	4575	4862
36.459	4547	4794
36.476	4518	4903
36.493	4622	4861
36.51	4650	4807
36.527	4507	4924
36.544	4534	4903
36.561	4530	4823
36.578	4574	4788
36.595	4600	4887
36.612	4505	4850
36.629	4599	4835
36.646	4668	4902
36.663	4653	4849
36.68	4689	4874
36.697	4762	4957
36.714	4782	5034
36.731	4911	5061
36.748	5096	5137
36.765	5210	5255
36.782	5366	5275
36.799	5514	5486
36.816	5654	5653
36.833	5720	5688
36.85	5670	5714
36.867	5538	5544
36.884	5465	5533
36.901	5591	5621
36.918	5704	5605
36.935	5669	5771
36.952	5650	5756
36.969	5611	5742
36.986	5629	5778
37.003	5848	5740
37.02	6077	5818
37.037	6315	6132
37.054	6613	6345
37.071	7021	6492
37.088	7551	6876
37.105	8240	7340
37.122	9026	7882
37.139	9883	8619
37.156	11018	9427
37.173	12458	10405
37.19	14266	11585
37.207	16161	12911
37.224	18294	14444
37.241	20246	16062
37.258	21841	17417
37.275	23265	18569
37.292	24081	19462
37.309	24416	19942
37.326	23888	19680
37.343	22959	19314
37.36	21836	18458
37.377	20503	17662
37.394	19166	16704
37.411	17687	15640
37.428	16207	14261
37.445	14659	12948
37.462	13225	11836
37.479	12091	10834
37.496	10887	10047
37.513	10147	9111
37.53	9186	8681
37.547	8513	8140
37.564	7920	7684
37.581	7487	7123
37.598	6988	6838
37.615	6616	6688
37.632	6229	6119
37.649	6280	6080
37.666	5839	5830
37.683	5583	5703
37.7	5475	5430
37.717	5337	5369
37.734	5213	5316
37.751	4913	5035
37.768	4747	5001
37.785	4708	4994
37.802	4592	4866
37.819	4625	4848
37.836	4557	4828
37.853	4439	4782
37.87	4360	4749
37.887	4464	4569
37.904	4455	4550
37.921	4395	4577
37.938	4345	4595
37.955	4317	4612
37.972	4277	4530
[truncated: 2,472 more rows]
